# Supplementary material
Source: PubMed Central journal article supplement (PMC8885910)
Supplement: NIHMS1767175-supplement-1.pdf [file NIHMS1767175-supplement-1.pdf]

## Supplemental information

Supplemental Information includes Supplemental six figures and figure legends.

### **A** Enrichment Analysis of Injury Genes Unique to Males

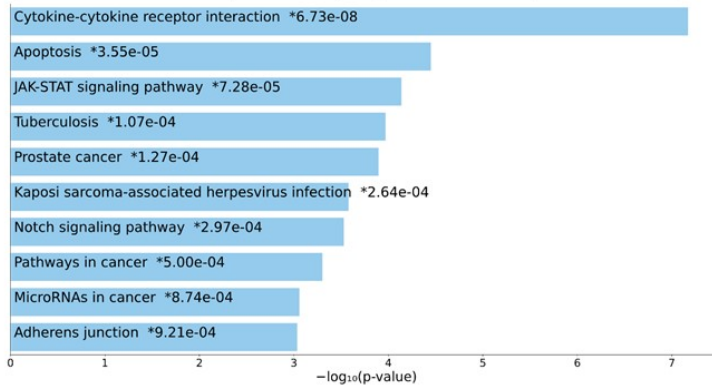

### **B** Enrichment Analysis of Injury Genes Unique to Females

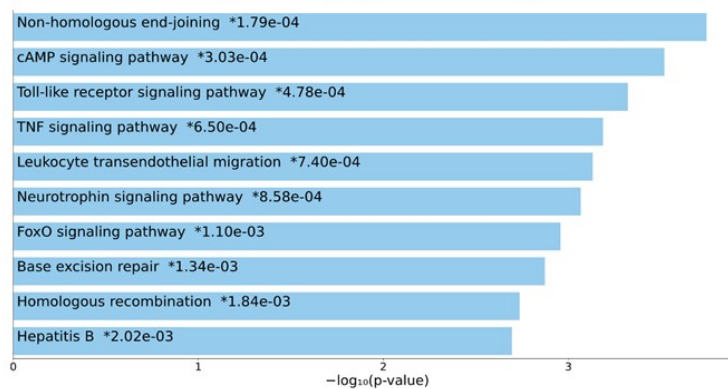

### **C** Enrichment Analysis of Genes Unique to Sex Dimorphism after Injury

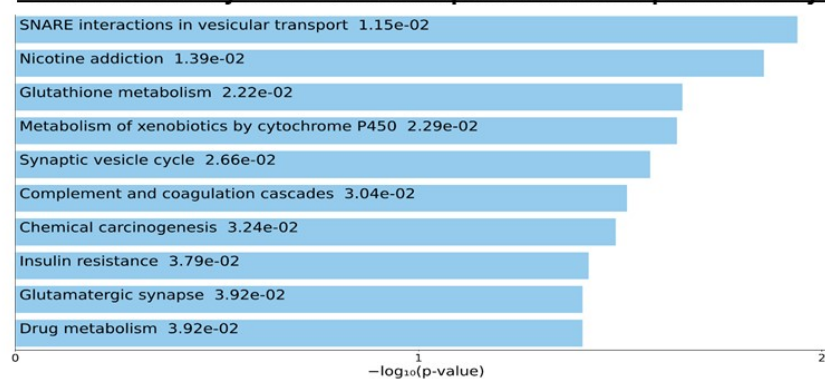

## Supplementary Figure 1. Enrichment analysis of genes unique to sex after injury. (A)

Enrichment analysis of injury genes unique to male mice show a high content of genes related to Cytokine-Cytokine Receptor Interaction and Apoptosis. The length of the bar represents the significance of that specific gene-set or term. Greater statistical significance is denoted by the increased brightness of the bar color. (B) Enrichment analysis of injury genes unique to female mice show a high content of genes related to Non-Homologous End-Joining and cAMP Signaling pathway. (C) Pathway analysis of genes unique to sex dimorphism after injury. N=3-4 mice/group.

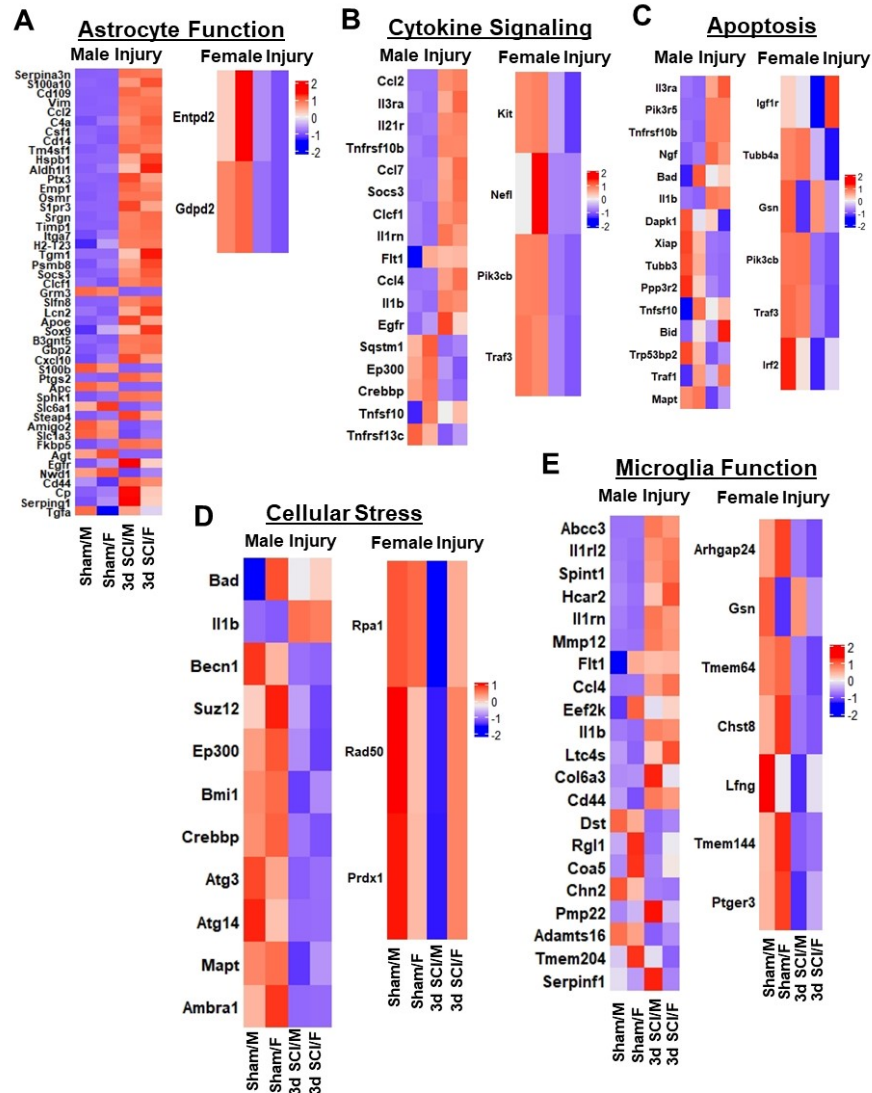

**Supplementary Figure 2. Sex dimorphism differentially modifies genes related to astrocyte function, cytokine signaling, cellular stress and microglia function in acute stages of SCI.**

(A) Heatmap of genes related to Astrocyte Function that are DE by injury in male mice but not in females and vice versa. Color coding was based on z-score scaling. (B) Heatmap of genes related to Cytokine Signaling that are DE by injury and male specific (left) or female specific (right). (C) Heatmap of genes related to Apoptosis that are DE by injury and male specific (left) or female specific (right). (D) Heatmap of genes related to Cellular Stress that are DE by injury and male specific (left) or female specific (right). (E) Heatmap of genes related to Microglia Function that are DE by injury and male specific (left) or female specific (right). N=3-4 mice/group.

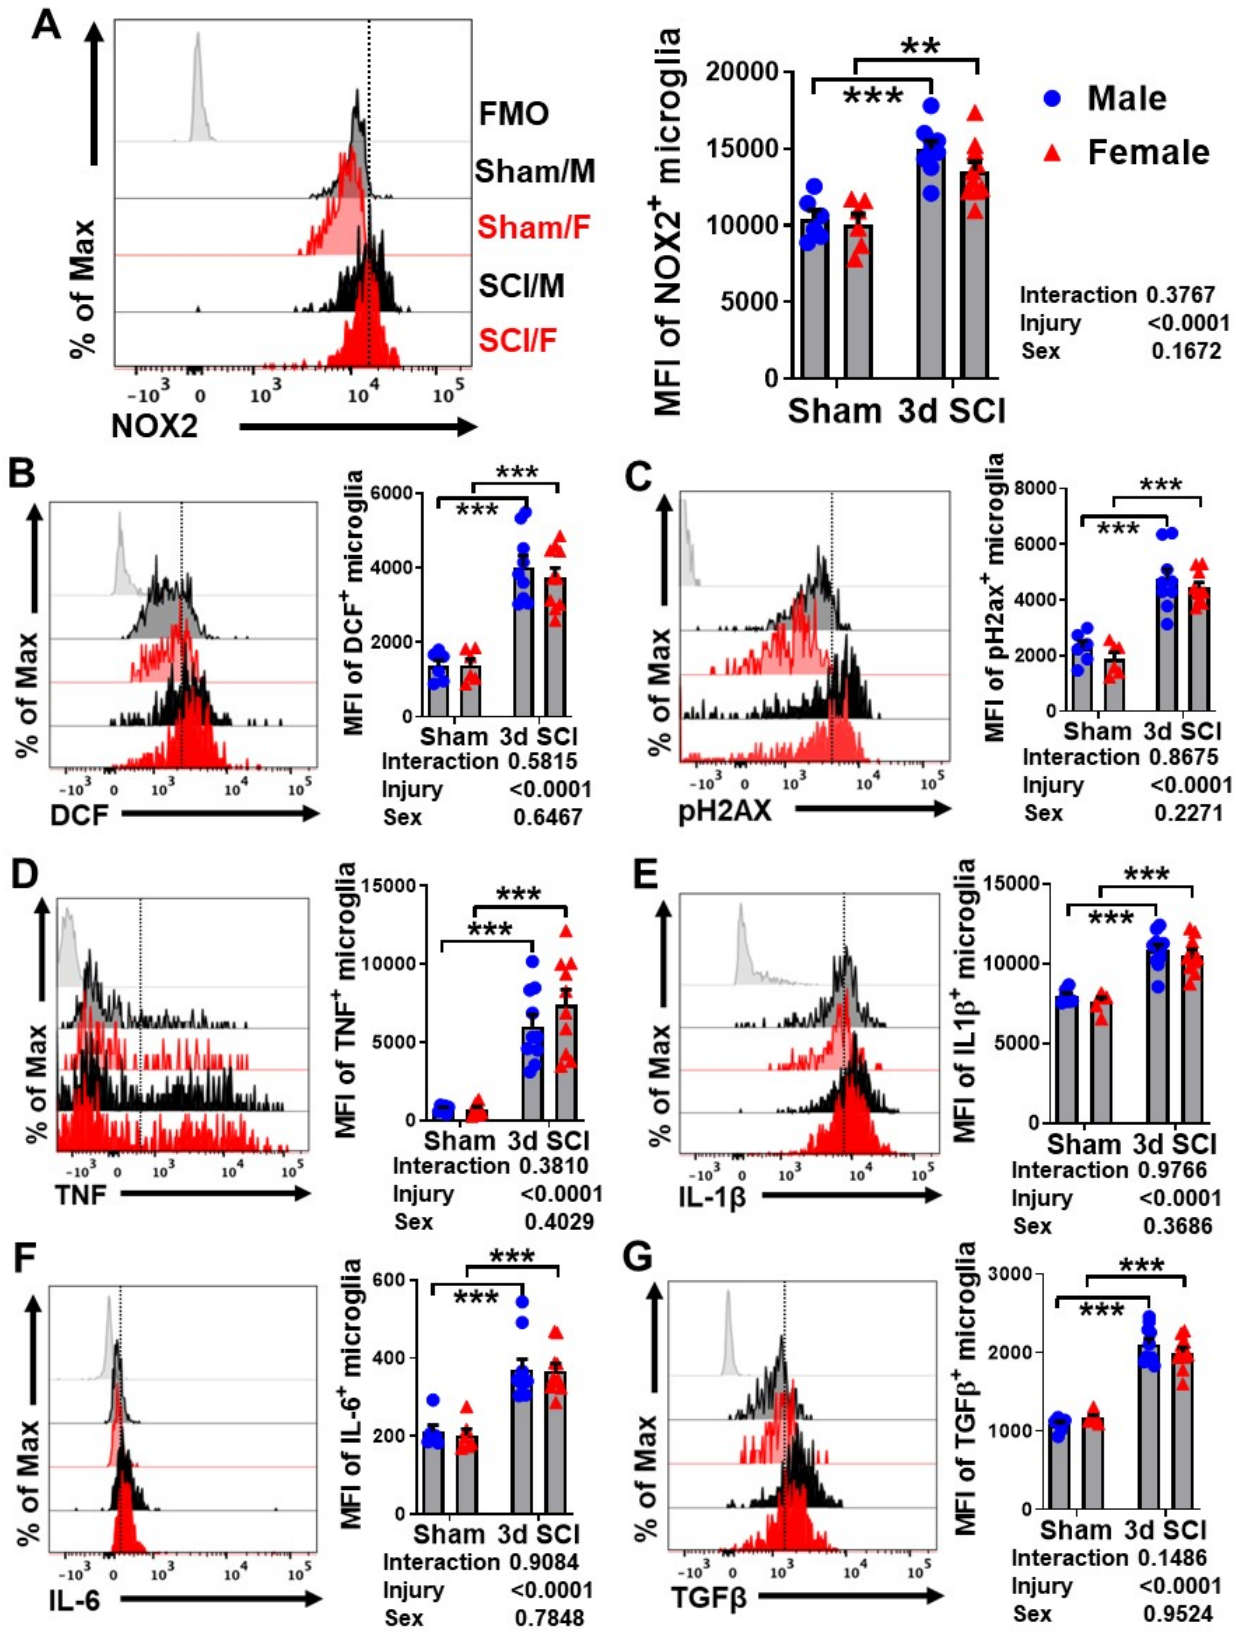

**Supplementary Figure 3. Microglial production of reactive oxygen species and inflammatory cytokines during acute spinal cord injury.** Microglial activity in male and female mice at 3d post-SCI was measured using flow cytometry. Representative histograms and subsequent MFI quantification of **(A)** NOX2 protein expression, **(B)** reactive oxygen species production, **(C)** DNA damage, and production of **(D)** TNF, **(E)** IL-1 $\beta$ , **(F)** IL-6 and **(G)** TFG $\beta$  cytokines in CD45<sup>int</sup>CD11b<sup>+</sup> microglia are shown. Significant differences were seen after injury, but not between sexes. For each sex, N=6 mice per sham group, and N=10 mice per SCI group. \*\*\*p<0.001 vs. Sham group; Two-way ANOVA following Tukey's multiple comparisons test. Abbreviations: d (day), FMO (fluorescence minus one), Max (maximum), MFI (mean fluorescence intensity), SCI (spinal cord injury),  $\mu$ m (micrometer).

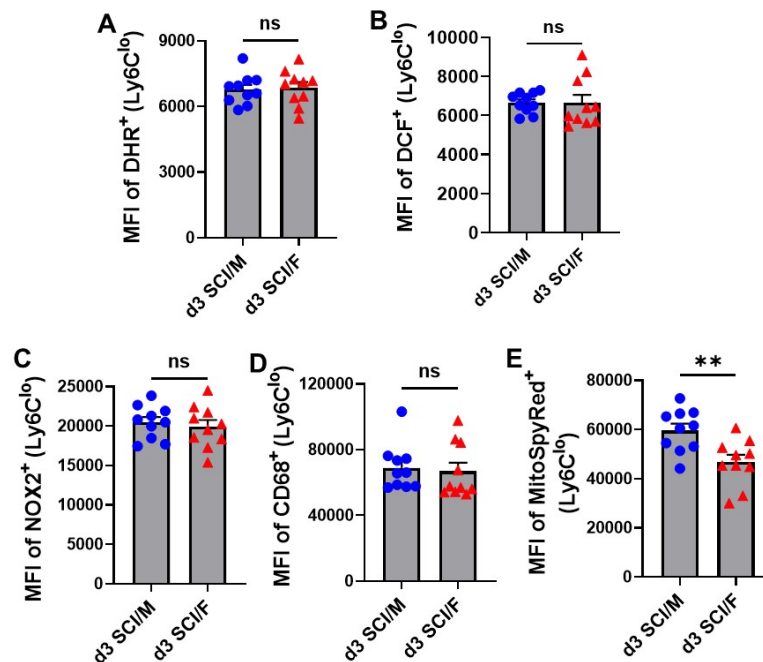

**Supplementary Figure 4. Sex differences in infiltrating CD45<sup>hi</sup>CD11b<sup>+</sup>Ly6C<sup>lo</sup> monocytes at 3 days post-injury.** **(A-B)** No sex differences were seen in ROS production as evidenced by both MFI of DHR<sup>+</sup> and DCF<sup>+</sup> Ly6C<sup>lo</sup> monocytes. **(C)** MFI quantification of NOX2 protein expression. **(D)** MFI quantification of CD68-positive Ly6C<sup>lo</sup> monocytes. **(E)** MFI of mitochondrial membrane potential in Ly6C<sup>lo</sup> monocytes using MitoSpyRed<sup>+</sup> was significantly lower in females vs. males after SCI. N=10 mice per SCI group. \*\*p<0.01 vs. SCI/M with unpaired t test.

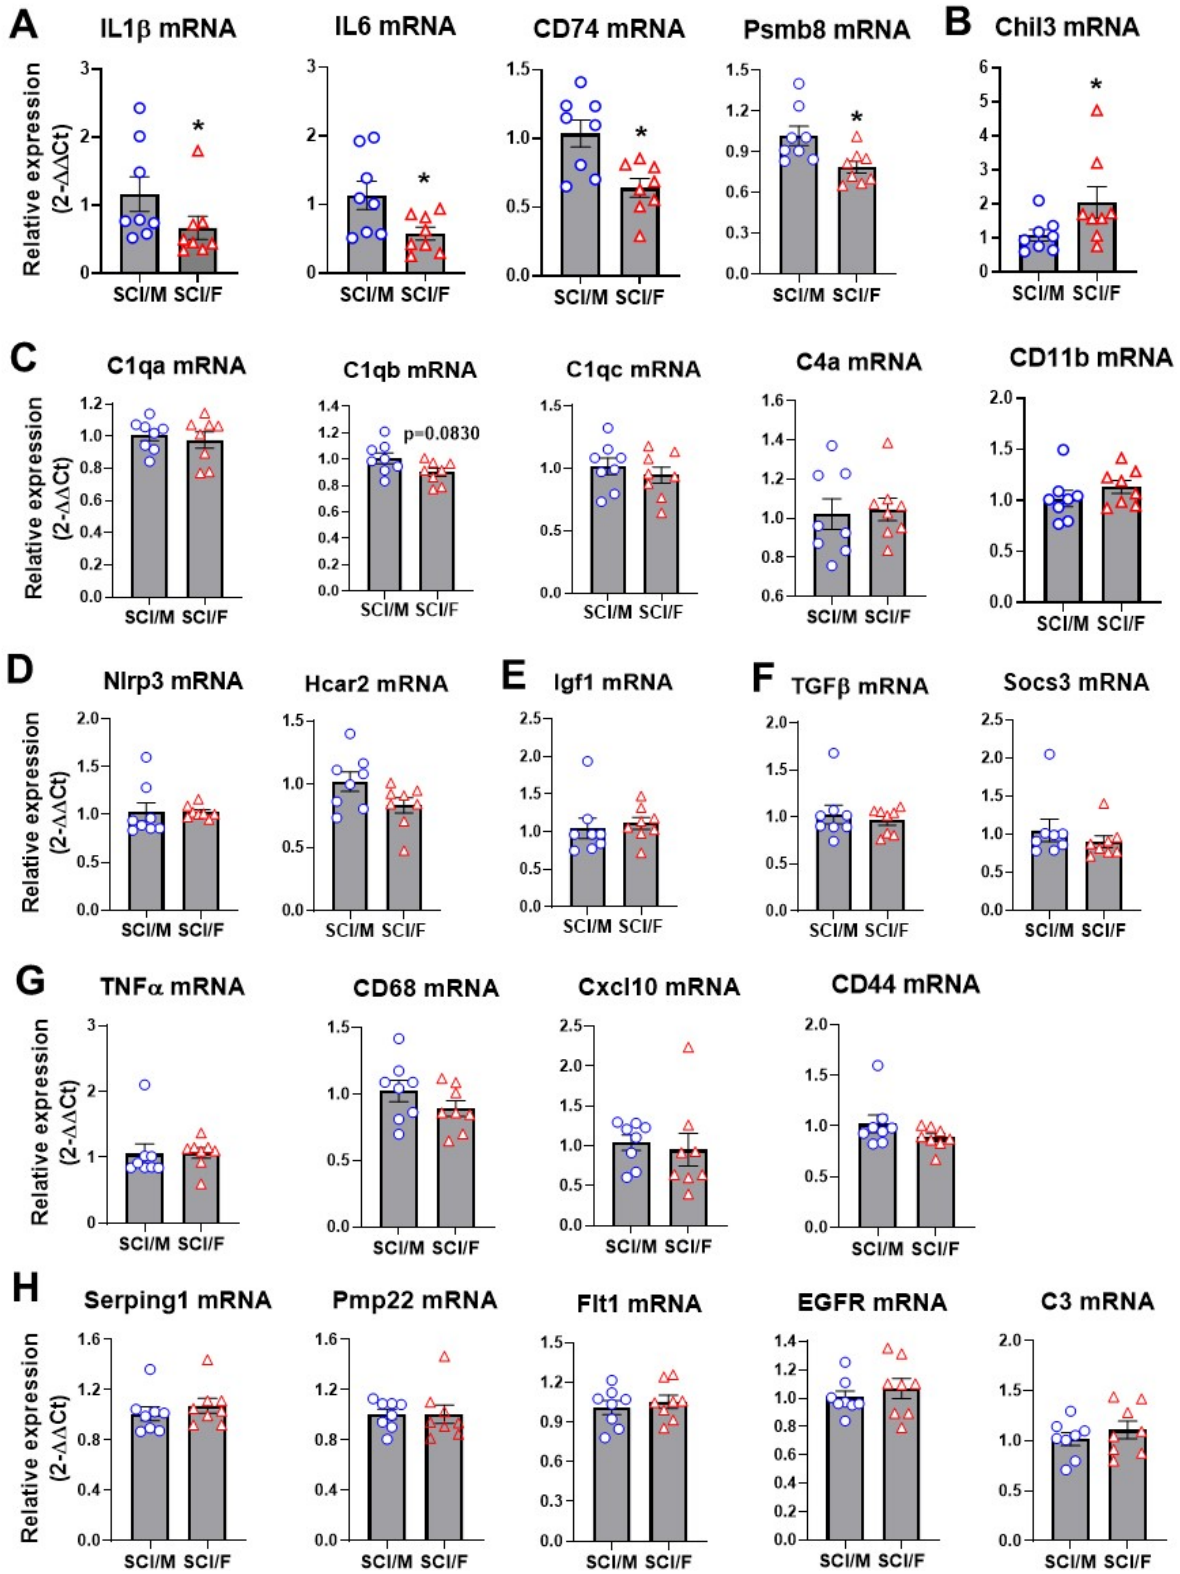



### Supplementary Figure 5. Middle-age alters inflammatory genes in response to acute SCI.

Six month-old male and female mice were subjected to SCI and spinal cord samples (~5-mm segments) were collected at 3 d post-injury and processed for RNA extraction and a list of inflammatory genes qPCR analysis. **(A)** Pro-inflammatory genes (IL1 $\beta$ , IL6, CD74, Psmb8) were downregulated in SCI/F mice compared to SCI/M animals. **(B)** Anti-inflammatory gene Chil3 (Ym1) expression was increased in SCI/F group vs SCI/M mice. **(C-D)** Complement pathway genes (C1qa, C1qb, C1qc, C4a), and Nlrp3, Hcar2 (hydroxycarboxylic acid receptor 2), and CD11b genes that were elevated in young SCI/F mice showed no differential changes between SCI/M and SCI/F in middle-age mice. **(E)** Igf1 (insulin-like growth factor I) mRNA expression that was significantly downregulated in young SCI/F mice showed no alteration between SCI/M and SCI/F in middle-age mice. **(F-H)** There were no differential changes between SCI/F and SCI/M groups in anti-inflammatory genes (TGF $\beta$ , Socs3), pro-inflammatory genes (TNF $\alpha$ , CD68, Cxcl10, CD44, Pmp22, C3, Flt1), and astrocyte function (Serping1, Egfr). Gene expression was normalized by GAPDH and expressed as a fold-change relative to sham vehicle control. n=8 mice/group with Mann Whitney test, \*p < 0.05.

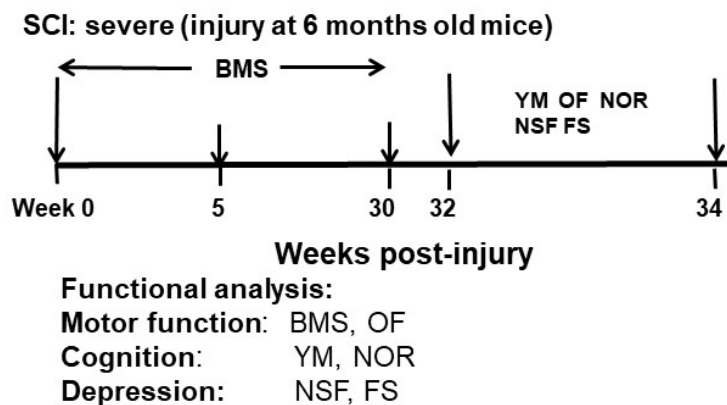

**Supplementary Figure 6.** Age-matched male and female C57BL/6 mice at 6 months old were subjected to severe (70 kdyn) SCI followed by 8 months post-injury. Diagram illustrating timepoints by weeks post-injury and behavior experiments conducted after the initial injury. All behavior tests are categorized by the functional outcome that was examined.
